# Supplementary material
Source: publisher figshare collection journal article supplement (https://sage.figshare.com/ndownloader/files/15460307)
Supplement: Supplementary file 1 [file 15460307]

**Supplemental Figures**

**AP, oblique and lateral radiographs showing the most common patterns of dislocation with percentage of injury**

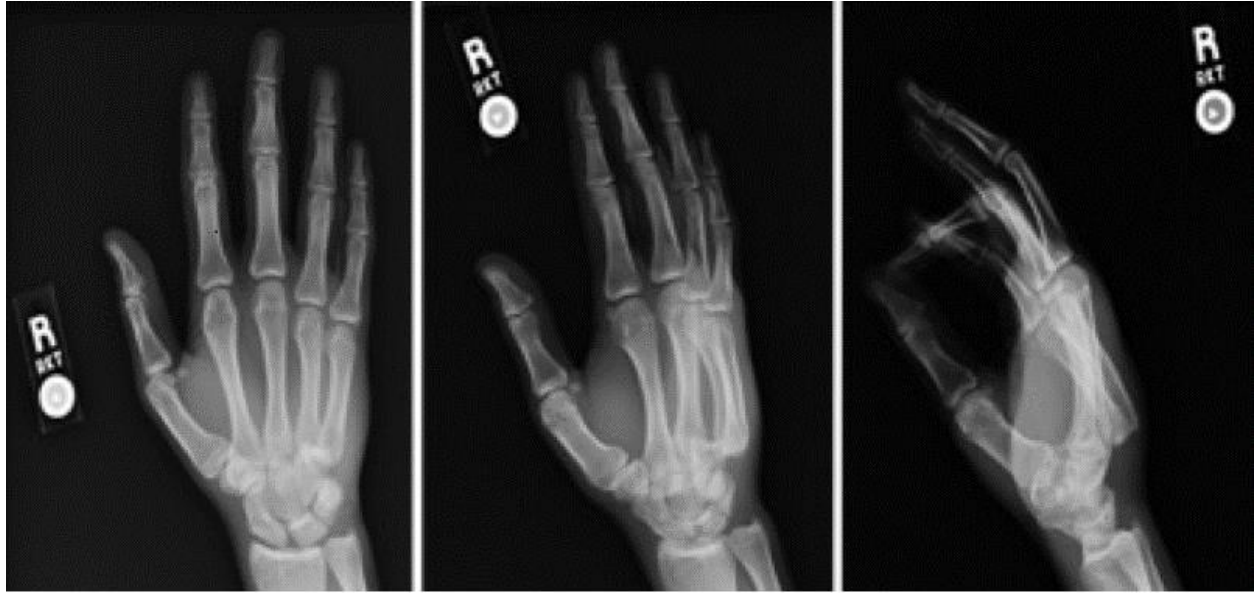

**Supplemental Figure S1: 4<sup>th</sup>-5<sup>th</sup> CMC fracture dislocation (47%)**

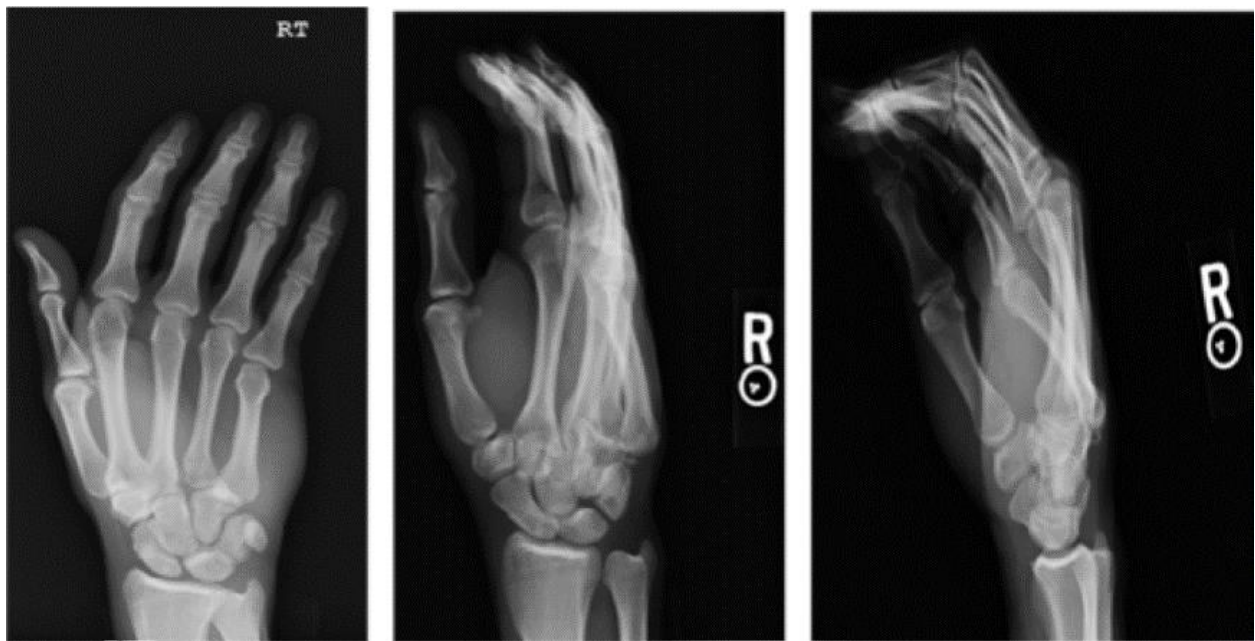

**Supplemental Figure S2: 5<sup>th</sup> CMC fracture dislocation (27.7%)**

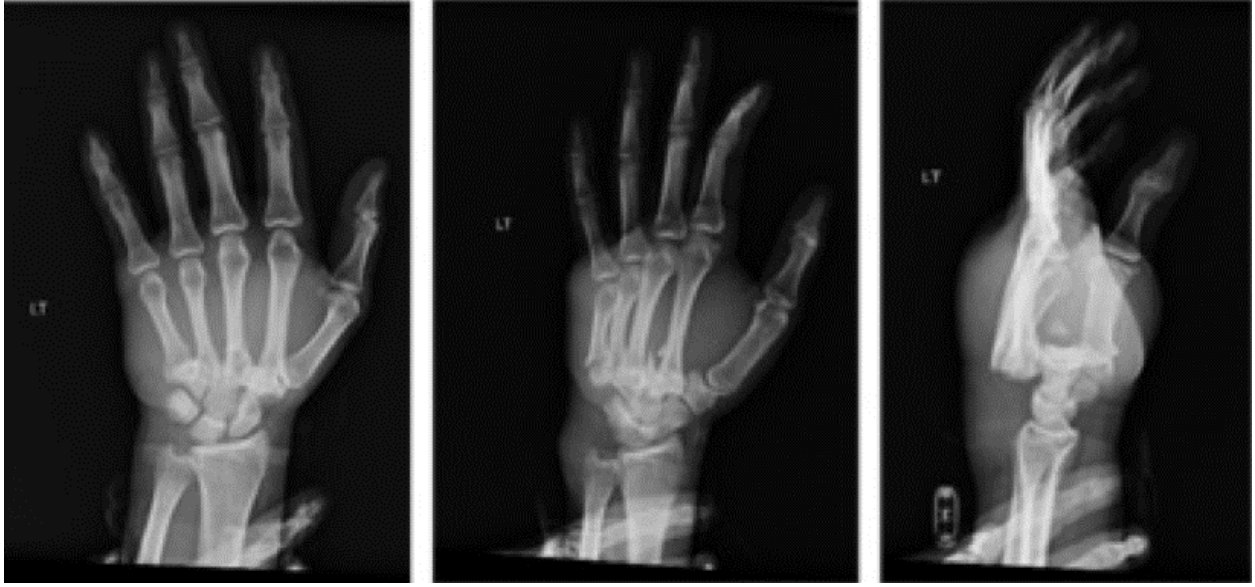

**Supplemental Figure S3:** 2<sup>nd</sup>-5<sup>th</sup> CMC fracture dislocation (14.5%)
